# Supplementary material for: Trained Innate Immunity in Animal Models of Cardiovascular Diseases
Source: MDPI journal article supplement (doi:10.3390/ijms25042312), 2024-02-15
Supplement: s1 [file s1]

**Supplementary Table S1.** Selection of pathogens and pathogen-derived vaccines that elicit a trained immunity effect.

| Pathogen Species | Pathogens<br>(1st Stimulus)      | Host Species   | Cell Type                            | Biological/Immunological Effects                                                                                                                                                                                                                                                                                                                    | References |
|------------------|----------------------------------|----------------|--------------------------------------|-----------------------------------------------------------------------------------------------------------------------------------------------------------------------------------------------------------------------------------------------------------------------------------------------------------------------------------------------------|------------|
| BACTERIA         | BCG vaccine                      | Human and mice | Monocytes<br>Macrophages<br>NK-cells | <ul style="list-style-type: none"> <li>Induction of non-specific protection against various infections beyond tuberculosis, such as yellow fever and malaria, e.g., due to enhanced cytokine production upon a 2nd stimulus.</li> </ul>                                                                                                             | [24,25,26] |
|                  | <i>Salmonella typhii</i> vaccine | Human          | Monocytes                            | <ul style="list-style-type: none"> <li>Oral vaccination with attenuated <i>Salmonella typhii</i> causes a reaction to a second non-specific stimulus with increased cytokine production, and enhanced expression of TLR4/5, as well as multiple surface markers on monocytes.</li> </ul>                                                            | [27]       |
|                  | <i>Pseudomonas aeruginosa</i>    | Human          | Epithelial cells                     | <ul style="list-style-type: none"> <li>Exposure of respiratory epithelial cells with <i>P. aeruginosa</i> modulated their response to a subsequent different stimulus.</li> <li>Employing inhibitors of histone acetyltransferase and methyltransferase, epigenetic regulation was assumed as the reason.</li> </ul>                                | [16]       |
|                  | <i>Acinetobacter baumannii</i>   | Mouse          | Macrophages                          | <ul style="list-style-type: none"> <li>Intranasal vaccination can induce a training effect in alveolar macrophages and protected against subsequent infection not only with <i>A. baumannii</i> but also with <i>P. aeruginosa</i>.</li> <li>Enhanced TLR4- and TNF-<math>\alpha</math> expression was observed in RAG-1 deficient mice.</li> </ul> | [17]       |
|                  | <i>Neisseria gonorrhoe</i>       | Human          | Macrophages                          | <ul style="list-style-type: none"> <li>Epigenetic modifications, like enriched H3K9ac, were detected, indicating that <i>N. gonorrhoe</i> leads to a trained immunity phenotype in macrophages.</li> </ul>                                                                                                                                          | [18]       |
|                  | Measles vaccine                  | Human          |                                      | <ul style="list-style-type: none"> <li>Mortality studies in developing countries suggest that the measles vaccine may provide a broad general positive impact on mortality</li> </ul>                                                                                                                                                               | [28]       |
| VIRUSES          |                                  |                |                                      |                                                                                                                                                                                                                                                                                                                                                     |            |

|       |                                |       |                 |                                                                                                                                                                                                                                                                                                                                                                                    |      |
|-------|--------------------------------|-------|-----------------|------------------------------------------------------------------------------------------------------------------------------------------------------------------------------------------------------------------------------------------------------------------------------------------------------------------------------------------------------------------------------------|------|
|       |                                |       |                 | rates, independent of its targeted protection against measles.                                                                                                                                                                                                                                                                                                                     |      |
|       | Smallpox vaccine               | Human |                 | <ul style="list-style-type: none"> <li>Immunization correlated with improved long-term survival in a high-income country, not accountable for by the vaccine's specific protective effects.</li> </ul>                                                                                                                                                                             | [29] |
|       | Oral polio vaccine (OPV)       | Human |                 | <ul style="list-style-type: none"> <li>Vaccination with OPV reduces all course childhood mortality in developing-countries.</li> </ul>                                                                                                                                                                                                                                             | [30] |
|       | Influenza vaccine              | Human | Monocytes       | <ul style="list-style-type: none"> <li>Influenza vaccination was linked to a reduction in SARS-CoV-2 infections and an improved immune response concerning various viral stimuli.</li> <li>In addition to adaptation in surface molecules of monocytes, decreased production of IL-1<math>\beta</math> and IL-6 and additionally an increase in IL-1-RA could be shown.</li> </ul> | [31] |
|       | Herpesvirus                    | Mice  | Macrophages     | <ul style="list-style-type: none"> <li>Protection against a subsequent infection with <i>Listeria monocytogenes</i> and <i>Yersinia pestis</i> due to enhanced production of IFN-<math>\gamma</math> and activation of macrophages.</li> </ul>                                                                                                                                     | [19] |
|       | Hepatitis B virus              | Human | Monocytes       | <ul style="list-style-type: none"> <li>Exposure of newborns to HBV in utero appears to trigger a state of trained immunity.</li> <li>In vitro analyses revealed that umbilical cord blood exhibited heightened responsiveness to bacterial infection, evidenced by alterations in cytokine production, for instance.</li> </ul>                                                    | [20] |
| FUNGI | <i>Candida albicans</i>        | Mouse | Monocytes       | <ul style="list-style-type: none"> <li><math>\beta</math>-glucan in fungal cell wall triggers alterations in the genetic expression of immune-related genes, leading to heightened cytokine production in monocytes.</li> </ul>                                                                                                                                                    | [21] |
|       | <i>Cryptococcus neoformans</i> | Mouse | Dendritic cells | <ul style="list-style-type: none"> <li>Enhanced proinflammatory cytokine production, such as IFN-<math>\gamma</math>, associated with</li> </ul>                                                                                                                                                                                                                                   | [22] |

|           |                              |       |       |                                                                                                                                                                                                                                                                                                |      |
|-----------|------------------------------|-------|-------|------------------------------------------------------------------------------------------------------------------------------------------------------------------------------------------------------------------------------------------------------------------------------------------------|------|
|           |                              |       |       | epigenetic changes in response to a 2nd stimulus.                                                                                                                                                                                                                                              |      |
| PARASITES | <i>Plasmodium falciparum</i> | Human | PBMCs | <ul style="list-style-type: none"><li>• After exposure to <i>Plasmodium falciparum</i>, the response of PBMCs was increased when exposed to TLR2 stimulation. Characteristic epigenetic and metabolic alterations associated with a trained immunity phenotype have been identified.</li></ul> | [23] |
